# Supplementary material for: Transition-metal single atoms embedded into defective BC3as efficient electrocatalysts for oxygen evolution and reduction reactions
Source: Royal Society of Chemistry journal article supplement (doi:10.1039/d0nr07580a), 2020-12-18
Supplement: d0nr07580a1.pdf [file d0nr07580a1.pdf]

## Supporting Information

### Transition-metal single atoms embedded into defective BC<sub>3</sub> as efficient electrocatalysts for oxygen evolution and reduction reactions

Yanan Zhou,<sup>a,b</sup> Guoping Gao,<sup>b</sup> Wei Chu,<sup>\*a</sup> and Lin-Wang Wang<sup>\*b</sup>

<sup>a</sup> School of Chemical Engineering, Sichuan University, Chengdu, 610065, Sichuan, China

<sup>b</sup> Materials Science Division, Lawrence Berkeley National Laboratory, Berkeley, 94720, California, United States

\*Corresponding authors.

E-mail address: chuwei1965@scu.edu.cn (Wei Chu); lwwang@lbl.gov (Lin-Wang Wang).

**Fig. S1.** Optimized structures of models: (a) (3x3) p-BC<sub>3</sub> monolayer, (b) (3x3) V<sub>B</sub> monolayer, (c) (3x3) V<sub>C</sub> monolayer, (d) (3x3) V<sub>BC</sub> monolayer and (e) (3x3) V<sub>CC</sub> monolayer. The red line indicates the unit cell. The calculated density of states (DOS) of (f) (3x3) p-BC<sub>3</sub> monolayer, (g) (3x3) V<sub>B</sub> monolayer, and (h) (3x3) V<sub>C</sub> monolayer, respectively. The Fermi level is set at zero represented by the black dash line.

**Fig. S2.** Gibbs free energy of adsorbates corresponding to the d band center for (a) TM@V<sub>B</sub> and (b) TM@V<sub>C</sub>.

**Fig. S3.** Schematic diagrams of Rh/H and Pd/H substitution reactions for catalysts: (a) Rh@V<sub>B</sub> and (b) Pd@V<sub>C</sub>.

**Fig. S4.** The minimum energy pathway of adsorbed Rh atom diffused from the vacancy adsorption site to a neighboring hollow site on Rh@V<sub>B</sub> catalyst.

**Table S1** The detailed parameters for the optimized TM@V<sub>B</sub> structures.  $d_{\text{TM-C}}$  is the bond distance between TM atom and its nearest C neighbor. Q refers to charges transfer from TM

atoms to the  $V_B$  substrate obtained by Bader charge analysis.

**Table S2** The detailed parameters for the optimized  $TM@V_C$  structures.  $d_{TM-C/B}$  is the bond distance between TM atom and its nearest C/B neighbor. Q refers to charges transfer from TM atoms to the  $V_C$  substrate obtained by Bader charge analysis.

**Table S3** Computed adsorption free energies of  $HO^*$ ,  $O^*$  and  $HOO^*$  ( $\Delta G_{HO^*}$ ,  $\Delta G_{O^*}$ , and  $\Delta G_{HOO^*}$ ), overpotentials for OER ( $\eta^{OER}$ ) and ORR ( $\eta^{ORR}$ ) on  $TM@V_B$  systems, as well as the d band center values that related to Fermi level of  $TM@V_B$ . The unit for  $\Delta G$  is eV, while for  $\eta$  is V.

**Table S4** Computed adsorption free energies of  $HO^*$ ,  $O^*$  and  $HOO^*$  ( $\Delta G_{HO^*}$ ,  $\Delta G_{O^*}$ , and  $\Delta G_{HOO^*}$ ), overpotentials for OER ( $\eta^{OER}$ ) and ORR ( $\eta^{ORR}$ ) on  $TM@V_C$  systems, as well as the d band center values that related to Fermi level of  $TM@V_C$ . The unit for  $\Delta G$  is eV, while for  $\eta$  is V.

**Table S5**  $\Delta G_{(TM^{n+})}$  and  $\Delta G_{diss}(0)$  values in this work. Positive value of  $\Delta G_{diss}(0)$  indicates the  $TM@V_B$  catalyst is stable against dissolution at pH = 0 condition.  $pH_{min}$  is the minimum pH value corresponding to the  $\Delta G_{diss}(0)$ . In this work, the maximum and minimum pH values are set as 16.0 and -2.0, respectively, which are realistic in this region.

**Table S6**  $\Delta G_{(TM^{n+})}$  and  $\Delta G_{diss}(0)$  values in this work. Positive value of  $\Delta G_{diss}(0)$  indicates the  $TM@V_C$  catalyst is stable against dissolution at pH = 0 condition.  $pH_{min}$  is the minimum pH value corresponding to the  $\Delta G_{diss}(0)$ . In this work, the maximum and minimum pH values are set as 16.0 and -2.0, respectively, which are realistic in this region.

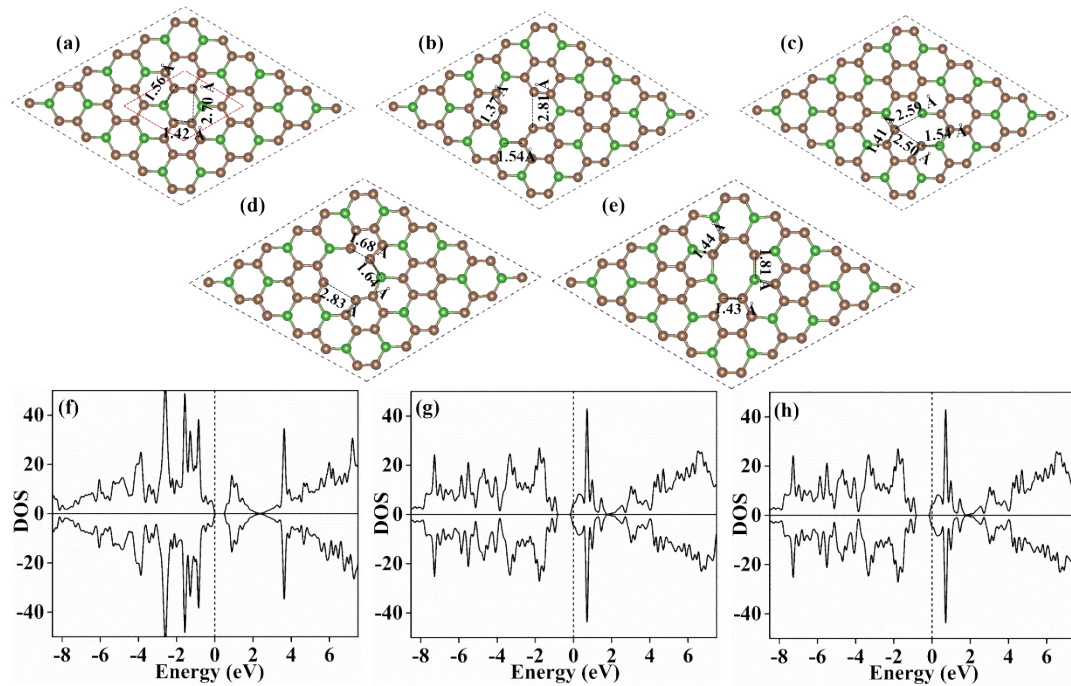

**Fig. S1.** Optimized structures of models: (a) (3x3) p-BC<sub>3</sub> monolayer, (b) (3x3) V<sub>B</sub> monolayer, (c) (3x3) V<sub>C</sub> monolayer, (d) (3x3) V<sub>BC</sub> monolayer and (e) (3x3) V<sub>CC</sub> monolayer. The red line indicates the unit cell. The calculated density of states (DOS) of (f) (3x3) p-BC<sub>3</sub> monolayer, (g) (3x3) V<sub>B</sub> monolayer, and (h) (3x3) V<sub>C</sub> monolayer, respectively. The Fermi level is set at zero represented by the black dash line.

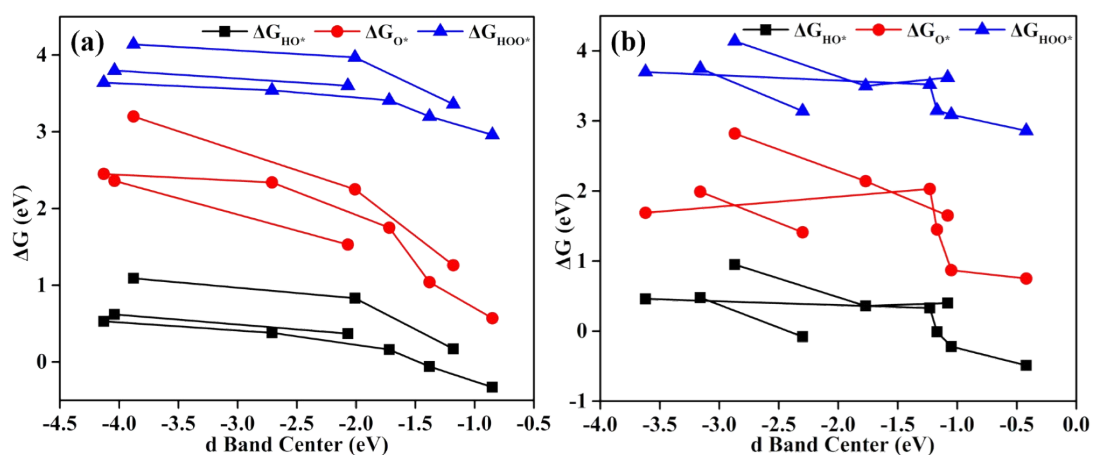

**Fig. S2.** Gibbs free energy of adsorbates corresponding to the d band center for (a) TM@V<sub>B</sub> and (b) TM@V<sub>C</sub>.

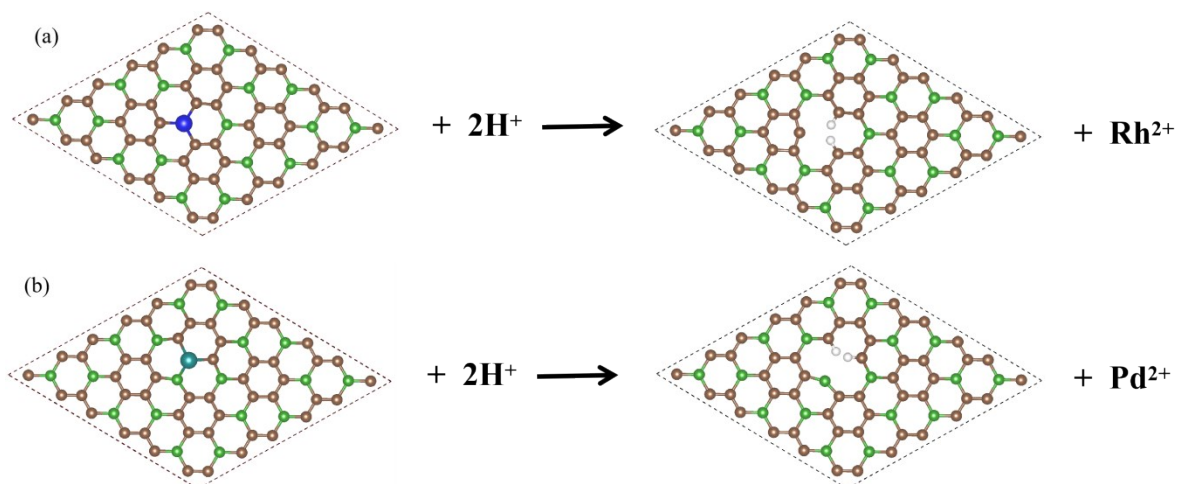

**Fig. S3.** Schematic diagrams of Rh/H and Pd/H substitution reactions for catalysts: (a) Rh@V<sub>B</sub> and (b) Pd@V<sub>C</sub>.

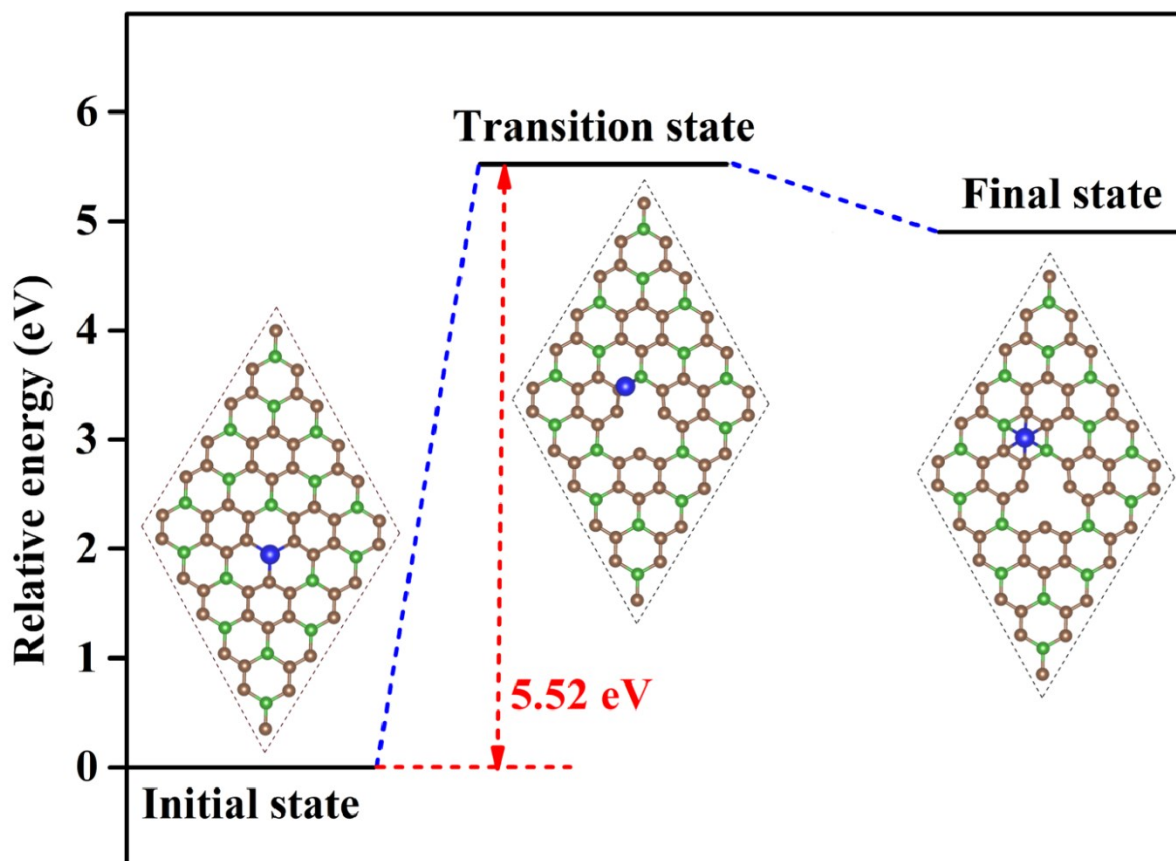

**Fig. S4.** The minimum energy pathway of adsorbed Rh atom diffused from the vacancy adsorption site to a neighboring hollow site on Rh@V<sub>B</sub> catalyst.

**Table S1** The detailed parameters for the optimized TM@V<sub>B</sub> structures.  $d_{\text{TM-C}}$  is the bond distance between TM atom and its nearest C neighbor. Q refers to charges transfer from TM atoms to the V<sub>B</sub> substrate obtained by Bader charge analysis.

| System            | $d_{\text{TM-C}}$ (Å) | Q (e) |
|-------------------|-----------------------|-------|
| Mn@V <sub>B</sub> | 1.88                  | 1.00  |
| Fe@V <sub>B</sub> | 1.82                  | 0.79  |
| Co@V <sub>B</sub> | 1.80                  | 0.66  |
| Ni@V <sub>B</sub> | 1.84                  | 0.56  |
| Cu@V <sub>B</sub> | 1.91                  | 0.61  |
| Ru@V <sub>B</sub> | 1.90                  | 0.64  |

|                   |      |      |
|-------------------|------|------|
| Rh@V <sub>B</sub> | 1.91 | 0.42 |
| Pd@V <sub>B</sub> | 1.97 | 0.40 |
| Ir@V <sub>B</sub> | 1.92 | 0.46 |
| Pt@V <sub>B</sub> | 1.95 | 0.34 |

**Table S2** The detailed parameters for the optimized TM@V<sub>C</sub> structures.  $d_{\text{TM-C/B}}$  is the bond distance between TM atom and its nearest C/B neighbor. Q refers to charges transfer from TM atoms to the V<sub>C</sub> substrate obtained by Bader charge analysis.

| System            | $d_{\text{TM-C}}$ (Å) | $d_{\text{TM-B}}$ (Å) | Q (e) |
|-------------------|-----------------------|-----------------------|-------|
| Mn@V <sub>C</sub> | 1.85                  | 2.03                  | 0.76  |
| Fe@V <sub>C</sub> | 1.82                  | 1.89                  | 0.52  |
| Co@V <sub>C</sub> | 1.78                  | 1.86                  | 0.32  |
| Ni@V <sub>C</sub> | 1.81                  | 1.89                  | 0.27  |
| Cu@V <sub>C</sub> | 1.89                  | 2.00                  | 0.39  |
| Ru@V <sub>C</sub> | 1.88                  | 1.95                  | 0.21  |
| Rh@V <sub>C</sub> | 1.90                  | 1.97                  | 0.06  |
| Pd@V <sub>C</sub> | 1.97                  | 2.00                  | 0.07  |
| Ir@V <sub>B</sub> | 1.90                  | 1.97                  | 0.04  |
| Pt@V <sub>C</sub> | 1.95                  | 1.99                  | 0.11  |

**Table S3** Computed adsorption free energies of HO\*, O\* and HOO\* ( $\Delta G_{\text{HO}^*}$ ,  $\Delta G_{\text{O}^*}$ , and  $\Delta G_{\text{HOO}^*}$ ), overpotentials for OER ( $\eta^{\text{OER}}$ ) and ORR ( $\eta^{\text{ORR}}$ ) on TM@V<sub>B</sub> systems, as well as the d band center values that related to Fermi level of TM@V<sub>B</sub>. The unit for  $\Delta G$  is eV, while for  $\eta$  is V.

| System            | $\Delta G_{\text{HO}^*}$ | $\Delta G_{\text{O}^*}$ | $\Delta G_{\text{HOO}^*}$ | $\eta^{\text{OER}}$ | $\eta^{\text{ORR}}$ |
|-------------------|--------------------------|-------------------------|---------------------------|---------------------|---------------------|
| Mn@V <sub>B</sub> | -0.33                    | 0.57                    | 2.96                      | 1.16                | 1.56                |
| Fe@V <sub>B</sub> | -0.06                    | 1.04                    | 3.20                      | 0.93                | 1.29                |
| Co@V <sub>B</sub> | 0.16                     | 1.75                    | 3.41                      | 0.43                | 1.07                |
| Ni@V <sub>B</sub> | 0.38                     | 2.34                    | 3.54                      | 0.73                | 0.85                |

|                   |      |      |      |      |      |
|-------------------|------|------|------|------|------|
| Cu@V <sub>B</sub> | 0.53 | 2.45 | 3.64 | 0.69 | 0.70 |
| Ru@V <sub>B</sub> | 0.17 | 1.26 | 3.36 | 0.87 | 1.06 |
| Rh@V <sub>B</sub> | 0.83 | 2.25 | 3.97 | 0.49 | 0.40 |
| Pd@V <sub>B</sub> | 1.09 | 3.20 | 4.14 | 0.88 | 0.45 |
| Ir@V <sub>B</sub> | 0.37 | 1.53 | 3.60 | 0.84 | 0.86 |
| Pt@V <sub>B</sub> | 0.62 | 2.36 | 3.80 | 0.51 | 0.61 |

**Table S4** Computed adsorption free energies of HO\*, O\* and HOO\* ( $\Delta G_{\text{HO}^*}$ ,  $\Delta G_{\text{O}^*}$ , and  $\Delta G_{\text{HOO}^*}$ ), overpotentials for OER ( $\eta^{\text{OER}}$ ) and ORR ( $\eta^{\text{ORR}}$ ) on TM@V<sub>C</sub> systems, as well as the d band center values that related to Fermi level of TM@V<sub>C</sub>. The unit for  $\Delta G$  is eV, while for  $\eta$  is V.

| System            | $\Delta G_{\text{HO}^*}$ | $\Delta G_{\text{O}^*}$ | $\Delta G_{\text{HOO}^*}$ | $\eta^{\text{OER}}$ | $\eta^{\text{ORR}}$ |
|-------------------|--------------------------|-------------------------|---------------------------|---------------------|---------------------|
| Mn@V <sub>C</sub> | -0.49                    | 0.75                    | 2.86                      | 0.88                | 1.72                |
| Fe@V <sub>C</sub> | -0.22                    | 0.87                    | 3.09                      | 0.99                | 1.45                |
| Co@V <sub>C</sub> | -0.01                    | 1.45                    | 3.15                      | 0.54                | 1.24                |
| Ni@V <sub>C</sub> | 0.33                     | 2.03                    | 3.52                      | 0.47                | 0.90                |
| Cu@V <sub>C</sub> | 0.46                     | 1.69                    | 3.70                      | 0.78                | 0.77                |
| Ru@V <sub>C</sub> | 0.40                     | 1.65                    | 3.62                      | 0.74                | 0.83                |
| Rh@V <sub>C</sub> | 0.36                     | 2.14                    | 3.50                      | 0.55                | 0.87                |
| Pd@V <sub>C</sub> | 0.95                     | 2.82                    | 4.14                      | 0.64                | 0.45                |
| Ir@V <sub>C</sub> | -0.08                    | 1.41                    | 3.14                      | 0.55                | 1.31                |
| Pt@V <sub>C</sub> | 0.48                     | 1.99                    | 3.75                      | 0.53                | 0.75                |

**Table S5**  $\Delta G_{(TM^{n+})}$  and  $\Delta G_{\text{diss}}(0)$  values in this work. Positive value of  $\Delta G_{\text{diss}}(0)$  indicates the TM@V<sub>B</sub> catalyst is stable against dissolution at pH = 0 condition. pH<sub>min</sub> is the minimum pH value corresponding to the  $\Delta G_{\text{diss}}(0)$ . In this work, the maximum and minimum pH values are set as 16.0 and -2.0, respectively, which are realistic in this region.

| TM | $\Delta G_{(TM^{n+})}$ | n | $\Delta G_{\text{diss}}(0)$ | pH <sub>min</sub> |
|----|------------------------|---|-----------------------------|-------------------|
|----|------------------------|---|-----------------------------|-------------------|

|    |       |   |       |       |
|----|-------|---|-------|-------|
| Mn | -1.18 | 2 | -3.68 | >16.0 |
| Fe | -0.45 | 2 | -2.42 | >16.0 |
| Co | -0.28 | 2 | -1.43 | 12.15 |
| Ni | -0.26 | 2 | -1.67 | 14.16 |
| Cu | 0.34  | 2 | -2.19 | >16.0 |
| Ru | 0.46  | 2 | -1.23 | 10.42 |
| Rh | 0.60  | 2 | 0.43  | <-2.0 |
| Pd | 0.95  | 2 | 0.61  | -5.13 |
| Ir | 1.16  | 3 | 0.51  | <-2.0 |
| Pt | 1.18  | 2 | 1.19  | <-2.0 |

**Table S6**  $\Delta G_{(TM^{n+})}$  and  $\Delta G_{\text{diss}}(0)$  values in this work. Positive value of  $\Delta G_{\text{diss}}(0)$  indicates the  $TM@V_C$  catalyst is stable against dissolution at  $\text{pH} = 0$  condition.  $\text{pH}_{\text{min}}$  is the minimum pH value corresponding to the  $\Delta G_{\text{diss}}(0)$ . In this work, the maximum and minimum pH values are set as 16.0 and -2.0, respectively, which are realistic in this region.

| TM | $\Delta G_{(TM^{n+})}$ | n | $\Delta G_{\text{diss}}(0)$ | $\text{pH}_{\text{min}}$ |
|----|------------------------|---|-----------------------------|--------------------------|
| Mn | -1.18                  | 2 | -3.90                       | >16.0                    |
| Fe | -0.45                  | 2 | -2.42                       | >16.0                    |
| Co | -0.28                  | 2 | -1.68                       | 14.23                    |
| Ni | -0.26                  | 2 | -1.50                       | 12.72                    |
| Cu | 0.34                   | 2 | -1.36                       | 11.54                    |
| Ru | 0.46                   | 2 | -0.86                       | 7.32                     |
| Rh | 0.60                   | 2 | 0.16                        | -1.38                    |
| Pd | 0.95                   | 2 | 0.88                        | <-2.0                    |
| Ir | 1.16                   | 3 | 1.35                        | <-2.0                    |
| Pt | 1.18                   | 2 | 1.57                        | <-2.0                    |
